# Iterative point set registration for aligning scRNA-seq data

Amir Alavi<sup>1</sup> and Ziv Bar-Joseph<sup>1,2,\*</sup>

<sup>1</sup>Computational Biology Department

<sup>2</sup>Machine Learning Department

School of Computer Science, Carnegie Mellon University, Pittsburgh, PA 15213

\*Corresponding author: [zivbj@cs.cmu.edu](mailto:zivbj@cs.cmu.edu)

## Abstract

Several studies profile similar single cell RNA-Seq (scRNA-Seq) data using different technologies and platforms. A number of alignment methods have been developed to enable the integration and comparison of scRNA-Seq data from such studies. While each performs well on some of the datasets, to date no method was able to both perform the alignment using the original expression space and generalize to new data. To enable such analysis we developed Single Cell Iterative Point set Registration (SCIPR) which extends methods that were successfully applied to align image data to scRNA-Seq. We discuss the required changes needed, the resulting optimization function, and algorithms for learning a transformation function for aligning data. We tested SCIPR on several scRNA-Seq datasets. As we show it successfully aligns data from several different cell types, improving upon prior methods proposed for this task. In addition, we show the parameters learned by SCIPR can be used to align data not used in the training and to identify key cell type-specific genes.

## 19 Author Summary

20 Integrating single cell expression data (scRNA-Seq) across labs, platforms, and technologies is a major  
21 challenge. Current methods for addressing this problem attempt to align cells in one study to match cells in  
22 another. While successful, current methods are unable to learn a general alignment in *gene space* that can be  
23 used to process new or additional data not used in the learning. Here we show that the scRNA-Seq alignment  
24 problem resembles a well known problem in the field of computer vision and robotics: point-cloud registration.  
25 We next extend traditional iterative rigid-object alignment methods for scRNA-seq while satisfying a set  
26 of unique constraints that distinguishes our solution from past methods. Analysis of transcriptomics data  
27 demonstrates that our method can accurately align scRNA-seq data, can generalize to unseen datasets, and  
28 can provide useful insights about genes active in the cells being studied.

## 29 1 Introduction

30 While only recently introduced, single-cell RNA-sequencing (scRNA-seq) has quickly developed into an  
31 indispensable tool for transcriptomics research. Driven by the development of droplet microfluidics-based  
32 methods [1, 2, 3, 4], current experiments are able to simultaneously profile expression of genes in tens of  
33 thousands of single cells. Studies ranging from cell type and state identification [5, 6] to tracking early  
34 development [7, 8] to unveiling the spatial organization of cells [9, 10] are all utilizing scRNA-Seq data,  
35 providing new insights about the activity of genes within and between cells.

36 While the size and number of individual scRNA-seq datasets is large and constantly growing, the question  
37 of how to integrate scRNA-Seq data from multiple experiments or platforms has become increasingly relevant.  
38 Different labs are seeking to analyze related tissues in an organ system, such as mapping out the cell types in  
39 the human pancreas [11] or building an adult mouse brain cell atlas [12]. On an even larger scale, consortia  
40 such as the Human Cell Atlas [13, 14] or the HUBMaP [15] are organizing researchers globally with the goal  
41 of mapping cells in the entire human body.

42 Combining datasets, even for the same tissue, across platforms or labs is a challenging problem. This  
43 process is often referred to “dataset alignment”, “dataset harmonization”, or “batch correction,” and is an  
44 active area of research. A number of methods have been recently suggested to address this problem. Many  
45 of these rely on nearest neighbors computations. For example, Mutual Nearest Neighbors (MNN) integrates  
46 two datasets by first identifying cells in the two datasets that are mutual nearest neighbors (in each other’s  
47 set of  $k$  nearest neighbors) [16]. It then computes vector differences between these pairs and uses weighted

48 averages of these vector differences to shift one batch onto the other. Another method, Seurat [17], extends  
49 this idea by first computing MNNs in a reduced dimension space, via canonical correlation analysis (CCA)  
50 which identifies common sources of variation between the two datasets, and then proceeding to correct the  
51 batch effects in a similar fashion as MNN. Other methods such as scVI [18] and ScAlign [19] use a neural  
52 network embedding to align the two datasets. These methods seek to encode the scRNA-seq datasets using  
53 a common reduced dimensional space in which the batch effects are reduced. While the above methods are  
54 unsupervised, there are also a few supervised methods proposed for this task. These method require as input  
55 the correct cell type labels for cells in the training data and use that to learn a function to assign cell types  
56 for the test data. An example of such method is Single Cell Domain Generalization Network (scDGN) which  
57 uses a supervised neural network trained with adversarial objectives to improve cell type classification [20].  
58 Another example is Moana, which uses hierarchical cell type classifiers robust to batch effects to project  
59 labels from one dataset onto another [21].

60 Each of the methods mentioned above offers different features and so might be appropriate for different  
61 settings. For example, some methods align the data in the given gene space and thus maintain gene semantics  
62 while others, namely the neural network-based methods, do the alignment in a new embedded space (i.e.  
63 a reduced dimensional space). On the other hand, the neural network methods typically are learning an  
64 alignment function which enables the alignment to be applied to new data (generalization). A comparison  
65 of the features of each of the methods is summarized in Table 1.

66 As the table shows, non of the current methods enables both, maintenance of semantics (required for  
67 analyzing genes following the alignment) and generalization (required for keeping the alignment consistent  
68 when new data arrives). Here we propose a new method, Single Cell Iterative Point set Registration (SCIPR),  
69 which achieves both using an unsupervised framework. Our method extends a well known method in image  
70 analysis termed iterative closest points (ICP), which is used for the problem of point-set or point-cloud  
71 registration [22]. In ICP, two datasets are represented as sets of points in a common coordinate system, and  
72 the method proceeds by pairing together points between the two sets and learning a transformation to move  
73 one set closer to (the corresponding points) in the other [23].

74 We tested SCIPR on three benchmark datasets and compared its performance to several prior methods  
75 suggested for the alignment task. As we show, single cell iterative point set registration outperforms prior  
76 methods for most of the tasks and is able to generalize to both unseen data in the target and in the source  
77 batch by learning a general function which can be applied to new data. Finally, since it retains the original  
78 (gene space) representation, the coefficients learned by single cell iterative point set registration can be used

| Method       | Unsupervised? | Corrects input? | Maintains semantics? | Generalizable? | Transfers labels? |
|--------------|---------------|-----------------|----------------------|----------------|-------------------|
| scDGN        |               | ✓               |                      | ✓              | ✓                 |
| Moana        | ✓             |                 |                      |                | ✓                 |
| ScAlign      | ✓             | ✓               |                      | ✓*             |                   |
| scVI         | ✓             | ✓               |                      | ✓              |                   |
| Harmony      | ✓             | ✓               |                      |                |                   |
| Scanorama    | ✓             | ✓               | ✓                    |                |                   |
| MNN          | ✓             | ✓               | ✓                    |                |                   |
| Seurat       | ✓             | ✓               | ✓                    |                |                   |
| <b>SCIPR</b> | ✓             | ✓               | ✓                    | ✓              |                   |

Table 1: Comparison of features and properties of various scRNA-seq alignment methods. The “Corrects input?” column refers to whether the method actually aligns (transforms) the input data batches in order to integrate them. The “Maintains semantics?” column refers to whether the output of the method retains the gene semantics given as input. The “Generalizable?” column refers to whether the method learns a model which can be applied to new data. The “Transfers labels?” column refers to whether the method also explicitly aims to apply the cell type labels of one data batch onto another, unlabeled batch.

\* ScAlign is theoretically able to be applied on new data, as it learns a neural network embedding model, but the ability to save and load the function in different sessions to apply it on new data was not available in software at the time of testing.

79 to identify key genes related to the cell types being analyzed.

## 80 **2 Results**

### 81 **2.1 Method and benchmarking overview**

82 We developed SCIPR which aligns two batches of scRNA-seq data (termed source and target) using methods  
83 motivated by point set registration algorithms. SCIPR first identifies corresponding pairs of cells between  
84 source and target batches (Figure 1 panel 1). Rather than using the closest cell (as defined by euclidean  
85 distance) in the target to match a source cell, SCIPR uses either of two matching algorithms to account  
86 for the heterogeneity and noise in scRNA-seq data: Mutual Nearest Neighbors (MNN) matching [16], and  
87 a novel greedy matching algorithm (Algorithm S1, Methods). Once a pairing of cells is established (Figure  
88 1 panel 2), a transformation function is learned to transform source cells so that they are closer to their  
89 matched target cell (Figure 1 panel 3). To allow for accurate alignment of high-dimensional scRNA-seq data,  
90 we replace the rigid transformation commonly used for point cloud registration with affine transformations.  
91 After fitting the transformation function (Methods), we apply it to the source cells (Figure 1 panel 4), and  
92 iteratively repeat the process until convergence. The final alignment function we learn is a composition of  
93 the transformation functions learned at each iteration (Methods) (Figure 1 panels 5,6).

94 We used three datasets to test and compare two versions of SCIPR to prior alignment methods (Methods).  
95 These comparisons were performed by testing the methods on several “alignment tasks”. An alignment task  
96 is defined by:

- 97 • A dataset (e.g. Pancreas)
- 98 • A source batch  $A$  within that dataset, which you would like to transform (e.g. indrop1)
- 99 • A target batch  $B$  within that dataset, which you would like to transform  $A$  onto (e.g. indrop 3)

100 For example, an alignment task can be summarized with the notation: *Pancreas: indrop1*  $\rightarrow$  *indrop3*. In  
101 the comparisons we performed we fix the target within a dataset to be the largest batch in that dataset. We  
102 scored the performance of the methods using local inverse Simpson’s Index (LISI) in which higher integration  
103 LISI (iLISI) is better and lower cell-type LISI (cLISI) is better [24] (Methods).

### 104 **2.2 An affine global transformation function yields well-mixed alignments**

105 We first evaluated the ability of SCIPR and other methods to integrate pairs of batches from three different  
106 datasets. Results for 8 alignment tasks in three datasets are presented in Figure 2. As the figure shows,  
107 for 7 of the 8 alignment tasks the two version of SCIPR ranked at the top. SCIPR-mnn was the overall

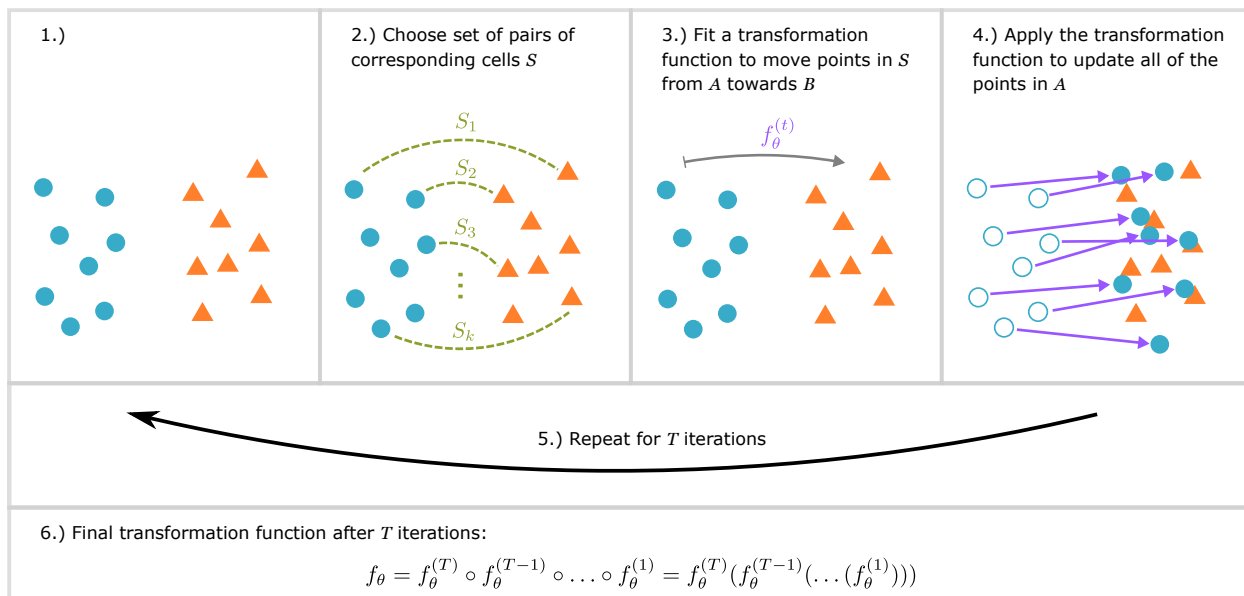

Figure 1: Summary of steps in iterative point set registration for scRNA-seq data. Each cell in an scRNA-seq dataset can be viewed as a point in high dimensional space. 1) We start with two unaligned batches (sources, blue and targets, orange). 2) A matching algorithm (e.g. picking the closest corresponding point, or using mutual nearest neighbors) is used to pair source cells from  $A$  with a corresponding target cell in  $B$ . The number of source and / or target cells matched can vary for different matching strategies. 3) Based on the selected pairs, a global transformation function is learned so that source cells in  $A$  become closer to their paired cell in  $B$ . 4) The learned transformation is next applied to all points in  $A$ . 5) This process (steps 2-4) is repeated, iteratively aligning set  $A$  onto  $B$  until the mean distance between the assigned pairs of cells no longer improves. 6) The final global transformation function is the composition of the functions learned in each iteration at step 3.

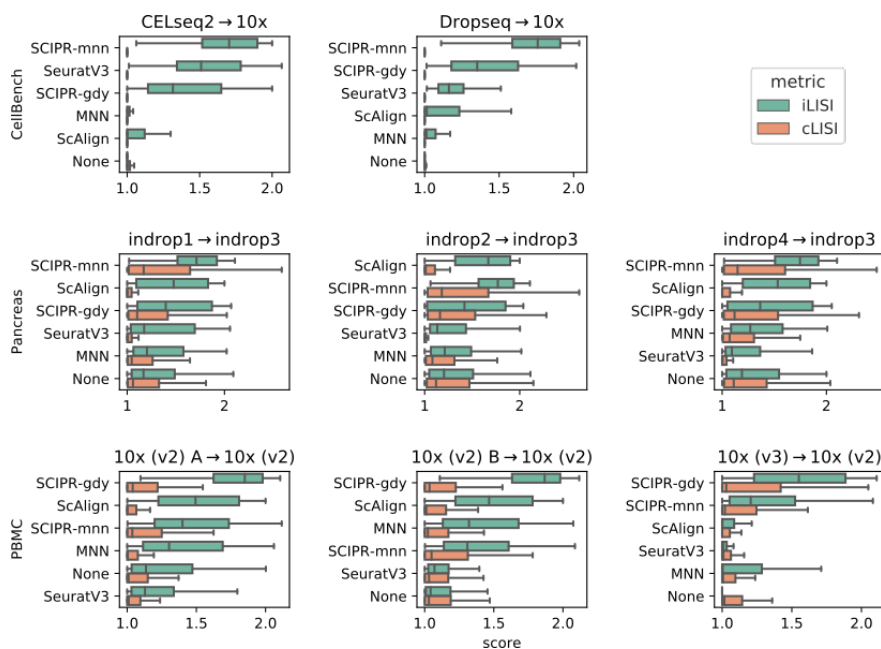

Figure 2: Quantitative scoring of alignment methods on benchmark datasets. Each row of subplots are tasks from the same dataset, where each column uses a different source batch (all are aligned to the same largest reference batch). The scores are iLISI (green, batch integration score), and cLISI (orange, cell type mixing score). In each subplot the methods are ordered from top to bottom in order of largest difference (median iLISI - median cLISI) of scores. The center of each box is the median, and whiskers represent 1.5 times the IQR past the low and high quartiles.

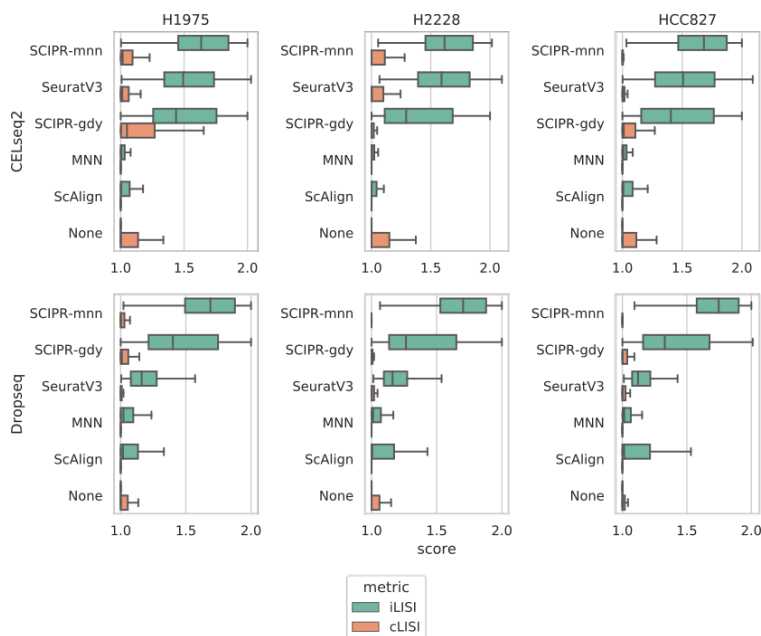

Figure 3: Quantitative scoring of alignment methods on the CellBench dataset with a cell type held out from the target set. Each row of subplots are alignment tasks with the same source batch, where each column uses a different cell type as a hold-out from the target set (the 10x batch). Order and box plot computation are similar to Figure 2.

108 top performer ranking first on 4 tasks and 2nd on 2 whereas SCIPR-gdy ranked first on 3 tasks and 2nd  
 109 on 1. The only other method that performed well is ScAlign which ranked first on 1 task and 2nd on 4.  
 110 For example, for the CellBench alignment tasks (first row of Figure 2), we see that SCIPR-mnn, which uses  
 111 the MNN matching for the cell pair assignment stage, has consistent better performance, and achieves high  
 112 batch mixing (1.70 and 1.76 median iLISI scores on *CELseq2*→10x and *Dropseq*→10x respectively) with very  
 113 little cell type mixing (1.00 median iLISI score on both *CELseq2*→10x and *Dropseq*→10x). When looking  
 114 at the same dataset, on the *CELseq2*→10x task the other methods such as ScAlign (iLISI: 1.00, cLISI: 1.00)  
 115 or SeuratV3 (iLISI: 1.51, cLISI: 1.00) are also able to avoid cell type mixing, but are not able to mix the  
 116 batches as much as SCIPR (Figure 2). Full alignment quantitative scores for these tasks and all others in the  
 117 paper are listed in Table S5. These quantitative metrics are also corroborated by a qualitative assessment  
 118 (Figure 4). There we can see that both SCIPR-gdy and SCIPR-mnn (top two rows) mix the batches well  
 119 (1st and 3rd columns) compared to methods like MNN and ScAlign while successfully keeping cell types  
 120 separate (2nd and 4th columns).



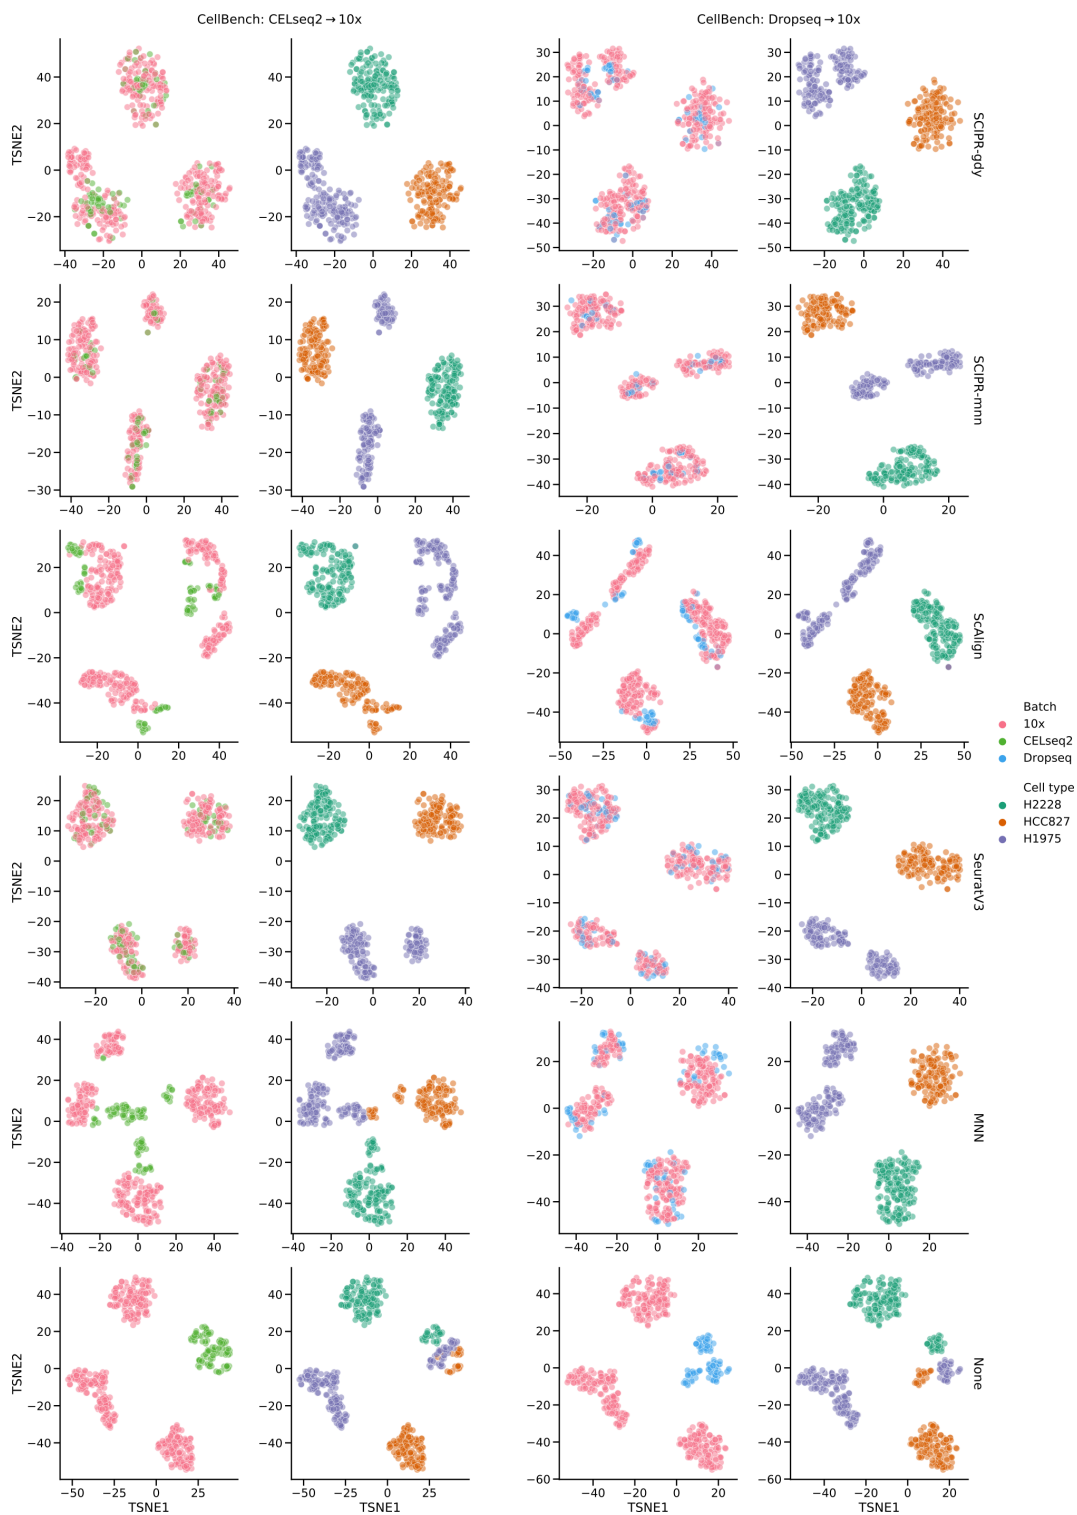

Figure 4: Embedding (t-SNE) visualization from alignment tasks on the CellBench dataset using various alignment methods. Each row is a different alignment method (the bottom row is with no alignment). The columns are in two groups based on alignment task: the left two columns pertain to aligning the CELseq2 batch onto the 10x batch, the right two columns are for aligning the Dropseq batch onto the 10x batch. The first and third columns are colored by batch, and the second and fourth columns are colored by cell type.

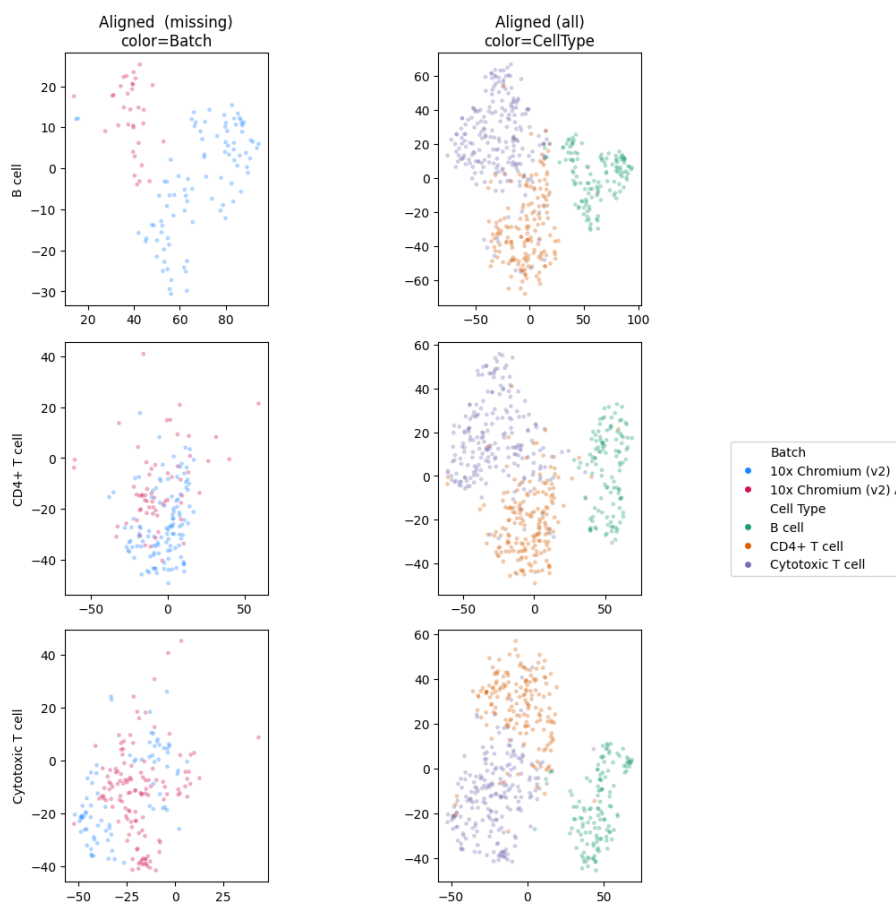

Figure 5: Embedding (t-SNE) visualization from the *PBMC:10x Chrom. (v2) A*  $\rightarrow$  *10x Chrom. (v2)* task using SCIPR-gdy showing generalizability to new cells. In each alignment task (rows), a different cell type is completely held-out from the *source* set. The model is then fitted to align the source and the target, and the model is then used to transform the full source set, including the held-out cell type which the model did not see in the source set used for fitting. The first column shows just the held-out cell type colored by batch, after applying the fitted SCIPR-gdy model to align it. The second column shows all of the data after applying the fitted model, colored by cell type.

## 121 **2.3 SCIPR robustly mixes batches with non-overlapping cell types**

122 The comparisons presented above involved sources and target batches with the same set of cells. However,  
123 in practice it is often unknown if both source and target indeed contain the same cell types. To test the  
124 robustness of SCIPR and other methods for such realistic scenarios we hold-out a complete cell type from the  
125 target set  $B$  in each of the alignment tasks from section 2.2. As the figures show, for these alignment tasks  
126 SCIPR is able to mix batches well, while keeping the median cell type mixing (iLISI) score low, though with  
127 a longer tail (Figures 3, S4, S5). For example, for the *CellBench: CELseq2→10x (H1975 cell type held-out*  
128 *from target)* task, SCIPR-mnn had median iLISI and cLISI scores of 1.63 and 1.02 respectively while the  
129 second best method, SeuratV3, had iLISI and cLISI scores of 1.49 and 1.01 respectively (Figure 3). On the  
130 other hand, for the task *Pancreas: indrop1→indrop3 (acinar cell type held-out from target)*, SCIPR-mnn  
131 achieves a higher median batch mixing score of iLISI=1.69 compared to ScAlign’s score of 1.57, but also  
132 mixes the cell types slightly more (SCIPR-mnn median cLISI score: 1.28, ScAlign median cLISI score:1.00)  
133 (Figure S4).

## 134 **2.4 SCIPR generalizes to unseen data**

135 One of the advantages of SCIPR compared to most previous methods is the fact that it learns a general  
136 transformation function that can be applied to additional data when it becomes available (Table 1). Such  
137 a function allows researchers to “fix” a specific setting rather than have all results completely change when  
138 new data is introduced. To test the use of the learned transformation function for unseen cell types in the  
139 *source dataset* we repeated our analysis, this time holding out a complete cell type from the source set in  
140 each alignment task. We next learned the transformation based on the available data and then applied the  
141 learned function to the held out data to evaluate the batch and cell type mixing. Results are presented in  
142 Figures 5, S6, S7, S8. As the figures show, the transformation learned by SCIPR allows it to keep cell types  
143 distinct, even for the unseen source cell type, while also being able to mix the batches of unseen cell types.  
144 This is evident in the high median iLISI (1.69) and low median cLISI (1.04) scores of SCIPR-gdy on the task  
145 *PBMC:10x Chrom. (v2) A→10x Chrom. (v2) (CD4+ T cell held-out from source)*, where the model is fit  
146 without seeing CD4+ T cells in the source set, but is then used to transform the full source set in evaluation  
147 (Figure S8). Figure 5 displays the aligned results for the cell type not used in the learning. As the figure  
148 shows, for CD4+ and Cytotoxic T cells SCIPR-gdy is able to mix the two batches even though it had never  
149 seen these in fitting.

## 150 **2.5 SCIPR identifies biologically relevant genes**

151 The above results demonstrate SCIPR’s ability to integrate batches quantitatively and qualitatively. Since  
152 SCIPR achieves these results by learning a transformation function that places different weights on different  
153 genes, we next asked whether the learned weights provide information on the importance of specific genes  
154 for the set of cells being studied. To evaluate such an approach we compared ranking genes based on their  
155 SCIPR coefficients to a baseline that ranks them based on differential expression (DE) (Appendix S6, S7).  
156 Next we performed gene set enrichment analysis using the Gene Ontology to identify the significant functions  
157 associated with top genes and test their relevance (Appendix S8). The PBMC dataset, which is the largest,  
158 was also the one with the most number of significant categories identified (Table S2). When comparing top  
159 ranked genes by SCIPR and DE for the “PBMC: 10x Chrom. (v2) A  $\rightarrow$  10x Chrom. (v2)” alignment task  
160 we observed that SCIPR genes significantly overlapped with much more relevant terms when compared to  
161 DE genes for the same dataset (Table S3). For example, the top three categories for top ranked SCIPR genes  
162 are “Defense response”, “Regulation of immune response”, and “Humoral immune response” (all with adj.  
163 p-value  $9.743e-9$ , Table S3). These categories are very relevant for blood cells given their immune system  
164 function. On the other hand, the top three categories recovered by top DE genes are much more generic  
165 and include “Ribonucleoprotein complex biogenesis”, “Ribosome assembly”, and “Cellular amide metabolic  
166 process” (Table S2).

### 167 **3 Discussion**

168 We presented SCIPR which extends point set registration for the alignment of scRNA-Seq data. SCIPR  
169 combines many of the desirable features of previous methods including the fact that its unsupervised, gen-  
170 eralizable, and keeps the original (gene space) representation. Analysis of several datasets show that SCIPR  
171 successfully aligns scRNA-Seq data improving upon other methods proposed for this task. When data is  
172 missing from either the source or the target the transformation function learned by SCIPR can be used to  
173 accurately align it when it becomes available. Finally, the coefficients learned by SCIPR provide valuable  
174 information on the key genes related to the cells being analyzed.

175 Framing scRNA-seq alignment as a point set registration problem opens the door to applying many of  
176 the developments and advancements in that area to scRNA-seq alignment. Point set registration is a mature  
177 area that has been widely used for more than two decades. As part of this researchers looked at several  
178 different types of transformation functions, data filtration, outlier handling, and association mapping, all of  
179 which may find applications in scRNA-seq analysis.

180 When evaluating SCIPR and prior methods we used the local inverse Simpson's Index (LISI) to quantify  
181 both cell type mixing and batch mixing. This leads to two values for each alignment task which can be  
182 combined for ranking the different methods by computing the difference of the medians  $iLISI - cLISI$ .  
183 Such ranking places equal weight on both issues. However, this score may not tell the whole story since some  
184 methods may be much better at one task vs. the other. For example, while SCIPR was ranked as the top  
185 method for most of the comparisons we performed, it has a tendency of to sacrifice some cell type separation  
186 in order to achieve greater batch mixing. Thus, depending on the user priorities between cell type and batch  
187 mixing, different methods may be more attractive even if the combined score is lower when compared to  
188 other methods.

189 While SCIPR performed best in our analysis, there are a number of ways in which it can be further  
190 improved. As mentioned above, SCIPR tends to weight batch mixing higher than cell type separation. A  
191 possible way to overcome this would be to add a regularization term to the transformation function to increase  
192 the weight of high scoring matches. Another option is to explore the use of non-linear transformations with  
193 strong customized regularization.

194 SCIPR is implemented as a Python package and can be downloaded from [https://github.com/AmirAlavi/](https://github.com/AmirAlavi/scipr)  
195 `scipr`, and our benchmarking pipeline and data used are available at [https://github.com/AmirAlavi/](https://github.com/AmirAlavi/sc-alignment-benchmarking)  
196 `sc-alignment-benchmarking` (see Appendix S1).

## 197 4 Methods

### 198 4.1 Dataset selection

199 To evaluate SCIPR and to compare its performance to previous alignment methods we used different scRNA-  
200 Seq datasets, each profiling similar cells in multiple batches. The first is the CellBench dataset (GEO:  
201 GSE118767) [25], which profiled human lung cancer cell lines and contained three batches, each from a  
202 different platform: 10x Chromium [4], Dropseq [2], and CEL-seq2 [26] (Table S1a). The smallest batch had  
203 210 cells (Dropseq) and the largest had 895 (10x Chromium) after removing cells with low reads, and we  
204 filtered the genes to the most highly variable genes across all batches leaving us with 2351 genes (Appendix  
205 S2). The second was data from human pancreatic cells (GEO: GSE84133) [27], with four batches all using  
206 Indrop sequencing [3] where the largest batch had 1488 cells (indrop3), the smallest had 834 cells (indrop4),  
207 and we used the five largest cell types and the set of 2629 highly variable genes (Table S1b). Finally, the third  
208 and largest dataset is a PBMC dataset (GEO: GSE132044) [28] which consisted of four different batches  
209 using 10x Chromium [4] sequencing. We used the three largest cell types and the largest batch had 2510  
210 cells (10x Chorm. (v2)), the smallest had 2011 cells (10x Chrom. (v2) A), and we used the set of 1466 highly  
211 variable genes (Table S1c). See Appendix for complete details.

### 212 4.2 scRNA-seq alignment

213 In the scRNA-seq alignment task, our goal is to learn a new representation of the data (either in the same  
214 dimensions as the original data, or in a new reduced dimension) to accomplish the following:

215 **Property 1** *Cell type identification: Cells from different cell types are distinct and cells from the same type*  
216 *are in close proximity*

217 **Property 2** *Batch mixing: Cells from different batches are mixed together as much as possible while re-*  
218 *specting the first property*

### 219 4.3 Point set registration for single cell alignment

220 Unsupervised alignment of single cell data relies on the implicit assumption that the different datasets share  
221 several of the same cell types though potentially using different representations for the same type. A similar  
222 assumption is central to much of the literature in point set registration, a well-studied problem in the robotics  
223 and computer vision fields [22]. In the point set registration problem, we wish to assign correspondences

224 between two sets of points (two “point clouds”), and learn a transformation that maps one set onto the other  
225 (Figure 1). Point sets are commonly the 2D or 3D coordinates of rigid objects, and the class of transformation  
226 function under consideration is often rigid transforms (rotations, reflections, and translations). The various  
227 point sets often originate from differing settings of sensors (viewing angle, lighting, resolution, etc) viewing  
228 the same objects or scene. Among the most widely used and classical of point-cloud registration algorithms  
229 is Bessl and McKay’s Iterative Closest Point (ICP) algorithm [23]. Briefly, each iteration of ICP has two  
230 steps: 1) assigning each point in one set ( $A$ , “source”) to its closest point in the other set ( $B$ , “target”), 2)  
231 update the rigid transformation function to transform the points in  $A$  as close as possible to their assigned  
232 points in set  $B$ . At the end of each iteration, the points in  $A$  are transformed via the current rigid transform  
233 and the process is repeated until convergence. Thus, each iteration of ICP can be concisely represented as  
234 minimizing the following loss function:

$$L_{ICP}(A, B, f_{\theta}) = \sum_{i \in A} \min_{j \in B} \frac{1}{d} \|f_{\theta}(A_i) - B_j\|_2^2 \quad (1)$$

where  $A, B \in \mathbb{R}^d$ , and  $d$  is the number of genes

and  $f_{\theta}$  is further constrained to rigid transformation functions

235 However, applying ICP as-is to align two scRNA-seq datasets could be problematic since:

- 236 • ICP assumes that every point in  $A$  corresponds to a point in set  $B$ , whereas scRNA-seq datasets  
237 may not fully overlap in cell types. For example, in studying embryonic development, we observe the  
238 transcriptome at different embryonic days, where some cell fates exist only after a certain day [29, 30].
- 239 • ICP assumes that a rigid transform relates the two sets. This may have been appropriate for 3D rigid  
240 objects, but not for the complicated, high-dimensional single cell transcriptome data.
- 241 • ICP is prone to assigning many points in  $A$  to the same point in  $B$  (collapsing a point) even when they  
242 are not fully compatible [31]. In contrast, if the same cell type exists in both datasets we can expect  
243 the number of cells to be more balanced.

244 Thus, while ICP has been very successful in image analysis, it requires modifications in order to accurately  
245 align scRNA-Seq data.

## 246 4.4 Adapting ICP for scRNA-seq dataset alignment

247 Given the discussion above, both stages of ICP need to be changed in order to align scRNA-Seq data. More  
248 formally, these two stages are:

- 249 1. Assignment stage (input: point sets  $A$  and  $B$ ) - assign pair set  $S \subseteq \{(i, j) \mid 1 \leq i \leq |A|, 1 \leq j \leq |B|\}$   
250 (Figure 1 panel 2). Options for this stage may vary in the cardinality of  $S$ , and whether or not it  
251 allows points to be shared between pairs.
- 252 2. Transformation stage (input: assigned pairs  $S$ ) - given  $S$  from the Assignment stage, learn a transform  
253 function that transforms points in  $A$  to reduce the mean squared error (MSE) between the assigned  
254 pairs in  $S$  (Figure 1 panel 3). Options for this stage vary based on the family of functions considered.

255 To adapt stage 1, we propose two approaches for assigning points in section 4.5: one based on a novel  
256 greedy algorithm and another based on Mutual Nearest Neighbors (MNNs). For stage 2, we set the family  
257 of transformation functions to be affine transformations (section 4.6).

## 258 4.5 Assigning cells between datasets

259 First, we focus on the Assignment stage. The input to this stage is the target set  $B$  and the current state  
260 of the source set of points  $A$  ( $A$  is being updated at every iteration of the algorithm). ICP computes the  
261 pairwise distance matrix between members of these sets  $D \in \mathbb{R}^{n \times m}$  where  $n = |A|$  and  $m = |B|$  (Figure S1),  
262 and finds the element in each row with the smallest distance to match to that point in  $A$ .

263 In contrast, for scRNA-seq alignment we would like to require the following:

- 264 • Not too many points in  $A$  are matched with the same point in  $B$  (avoid collapsing many points in one  
265 dataset onto a single point).
- 266 • Not all points must be assigned (since the two dataset may not fully overlap in terms of cell types).

267 One approach for addressing the first requirement is using a bipartite matching algorithm [32] instead  
268 of picking the closest point. In such an algorithm a global optimal matching is found such that each point  
269 is only matched to a single point in the other set. However, such algorithms violate the second requirement  
270 since they result in “perfect” matchings, where all points in  $A$  are matched. An alternative is to use partial  
271 matching algorithms in which only a subset (or a fraction) of the points in  $A$  are required to be matched  
272 to points in  $B$ . Optimal partial matching is a well studied problem in the computer science literature and



273 requires solving a min-cost flow graph problem [33]. The problem can be solved via an efficient network  
274 simplex algorithm, however, for graphs with thousands of nodes (as in single cell data) this is still rather  
275 time consuming. If we let the number of vertices be  $V = n + m$  (e.g. number of cells in both batches),  
276 the number of edges be  $E = n \times m$ , and the largest edge weight (distance between points) be  $C$ , then the  
277 polynomial time network simplex algorithm has a run time of  $O(VE \log V \log(VC))$  [34]. Given the large  
278 number of cells in each dataset such partial matching methods are too time consuming in practice (Figure  
279 S2).

280 Instead, in Algorithm S1 we propose an efficient greedy algorithm for partial assignment between  $A$  and  
281  $B$ . The algorithm sorts all of the edges between members of the two sets based on distance. Next, we  
282 proceed along the ordered edges starting from the smallest distance. If an edge includes a point in set  $B$   
283 that has already been selected  $\beta$  times by previously chosen edges, we discard it and continues down the list.  
284 Our algorithm has parameters to adjust how many times we allow each point in  $B$  to be matched to ( $\beta$ ),  
285 and how many of the points in  $A$  must be matched ( $\alpha$ ). In our experiments, we set  $\beta = 2$  and  $\alpha = 0.5$ . The  
286 runtime of this algorithm is dominated by the *sortElementsAscending* function which sorts the distances  
287 leading to a worst case runtime of  $O(E^2)$  and a much faster  $O(E \log(E))$  on average. Though not an optimal  
288 solution to the partial bipartite matching problem, we find that this works well in our related scRNA-seq  
289 cell pair assignment problem for alignment.

290 We also experiment with a matching procedure which follows the foundational work of using mutual  
291 nearest neighbors (MNNs) [16] to define our pair assignments between the two sets. For a point  $i$  in set  $A$   
292 and a point  $j$  in set  $B$ , if  $i$  is in the set of  $k$ -nearest neighbors among  $A$  for point  $j$ , and  $j$  is in the set of  
293  $k$ -nearest neighbors among  $B$  for point  $i$ , then  $i$  and  $j$  are MNNs. In our experiments, we set  $k = 10$ .

## 294 4.6 Learning a transformation function

295 So far we focused on matching points given their distance. In the next stage, we will fit a transformation  
296 function to align the matched points. As discussed above, the family of rigid transforms is not well suited  
297 to compute such alignments for scRNA-seq data (Figure S3). Instead, we propose to use the family of affine  
298 transformations to align scRNA-seq datasets. Affine transforms are of the form  $f_{\theta}(x) = W^T x + b$  where  
299  $\theta = \{W, b\}$  is the learnable weights of the function, and include rotation, reflection, scaling, and shearing.

300 To learn this function, we minimize an objective function that aims to move the assigned points closer to  
301 each other, via such an affine transformation. Given a pair assignment  $S$  from the previous step (section 4.5)  
302 (which may be the result of the classic “closest” strategy from ICP, our greedy algorithm, or MNN matching),

303 learning the transformation function (Figure 1 panel 3) is equivalent to minimizing the loss function given  
304 as Equation 2. We note that this objective function is not over all pairs of points in sets  $A$  and  $B$ ; it is  
305 computed over only those pairs of points selected in  $S$ , denoted by the subscript under the sum.

$$\begin{aligned} L(A, B, f_\theta, S) &= \frac{1}{|S|} \sum_{i,j \in S} \frac{1}{d} \|f_\theta(A_i) - B_j\|_2^2 \\ &= \frac{1}{|S|} \sum_{i,j \in S} \frac{1}{d} \|(W^T A_i + b) - B_j\|_2^2 \end{aligned} \quad (2)$$

where  $A, B \in \mathbb{R}^d$ , and  $d$  is the number of genes

306 This is a least-squares objective function. If the system is overdetermined, this could be solved exactly.  
307 However, due to the high dimension we are working in (each point is the expression of thousands of genes),  
308 the matrix inversion for the exact solution is expensive to compute, as matrix inversion is  $O(d^3)$ . To avoid  
309 this, we approximate the solution using gradient descent to arrive at our transformation function  $f_\theta^{(t)}$  for the  
310 current iteration  $t$  (see Appendix S5 for gradient descent settings).

## 311 4.7 Iterative step

312 After each of the stages (assignment and transformation function update), we use our learned transformation  
313 function at the current iteration  $f_\theta^{(t)}$  to transform the all points in  $A$  (not just those in the set  $S$  from the  
314 matching algorithm) (Figure 1 panel 4), and then repeat the stages for  $T$  iterations (Figure 1 panel 5). The  
315 final learned transformation of source points  $A$  to target points  $B$  is a chained series of transformations  
316 (composite function) from each iteration (Figure 1 panel 6). Since our function class for  $f_\theta$  is affine trans-  
317 formations, and the composition of affine transformations is itself an affine transformation, we can combine  
318 this chain of transformations into a single affine transformation. See Appendix S4 for details.

## 319 4.8 Validation

320 A number of methods have been proposed to test the accuracy of alignment based methods [35, 24]. These  
321 evaluation metrics try to balance two, sometimes competing, attributes. The first is dataset mixing which  
322 is the goal of the alignment. The second is cell type coherence. A method that randomly mixes the two  
323 datasets would score high on the first measure and low on the second while a method that clusters each of

324 the datasets very well but cannot match them will score high on the second and not on the first.

325 To track both dataset mixing and biological signal preservation, we follow [24] and use the local inverse  
326 Simpson's Index (LISI). LISI measures the amount of diversity within a small neighborhood around each  
327 point in a dataset, with respect to a particular label. The lowest value of LISI is 1 (no diversity). As in [24],  
328 we define integration LISI (iLISI) as the score computed when using the batch label for each datapoint, and  
329 cell-type LISI (cLISI) as the score when using the cell-type label. iLISI measures the effective number of  
330 datasets within the neighborhood (so the higher the better). cLISI measures the effective number cell types  
331 within the neighborhood (so the lower the better). With these two metrics in hand, we can keep track of  
332 not only the ability of our algorithms to align one dataset onto another, but also their ability to preserve  
333 original signal. In our figures which report the iLISI and cLISI scores, we rank the methods based on the  
334 difference of medians  $iLISI - cLISI$  score to capture the ability of the emthods to maximize and minimize  
335 these two quantities respectively.

336 **End Notes**

337 **Funding**

338 This work was partially funded by the National Institutes of Health (NIH) [grants 1R01GM122096 and  
339 OT2OD026682 to Z.B.J.].

340 **Author Contributions**

341 A.A. and Z.B.J. designed the study, the algorithms, and the analysis. A.A. developed and implemented the  
342 algorithms and performed all the analysis. A.A. and Z.B.J wrote the paper.

343 **Declaration of Interests**

344 The authors declare no competing interests.

## 345 References

- 346 1. Agresti JJ, Antipov E, Abate AR, Ahn K, Rowat AC, Baret JC, et al. Ultrahigh-throughput screening  
347 in drop-based microfluidics for directed evolution. *Proceedings of the National Academy of Sciences*.  
348 2010;107(9):4004–4009.
- 349 2. Macosko EZ, Basu A, Satija R, Nemesh J, Shekhar K, Goldman M, et al. Highly parallel genome-wide  
350 expression profiling of individual cells using nanoliter droplets. *Cell*. 2015;161(5):1202–1214.
- 351 3. Klein AM, Mazutis L, Akartuna I, Tallapragada N, Veres A, Li V, et al. Droplet barcoding for  
352 single-cell transcriptomics applied to embryonic stem cells. *Cell*. 2015;161(5):1187–1201.
- 353 4. Zheng GX, Terry JM, Belgrader P, Ryvkin P, Bent ZW, Wilson R, et al. Massively parallel digital  
354 transcriptional profiling of single cells. *Nature communications*. 2017;8(1):1–12.
- 355 5. Jaitin DA, Kenigsberg E, Keren-Shaul H, Elefant N, Paul F, Zaretsky I, et al. Massively parallel single-  
356 cell RNA-seq for marker-free decomposition of tissues into cell types. *Science*. 2014;343(6172):776–779.
- 357 6. Papalexi E, Satija R. Single-cell RNA sequencing to explore immune cell heterogeneity. *Nature*  
358 *Reviews Immunology*. 2018;18(1):35.
- 359 7. Raj B, Wagner DE, McKenna A, Pandey S, Klein AM, Shendure J, et al. Simultaneous single-cell  
360 profiling of lineages and cell types in the vertebrate brain. *Nature biotechnology*. 2018;36(5):442–450.
- 361 8. Spanjaard B, Hu B, Mitic N, Olivares-Chauvet P, Janjuha S, Ninov N, et al. Simultaneous lineage  
362 tracing and cell-type identification using CRISPR–Cas9-induced genetic scars. *Nature biotechnology*.  
363 2018;36(5):469–473.
- 364 9. Zhu Q, Shah S, Dries R, Cai L, Yuan GC. Identification of spatially associated subpopulations by  
365 combining scRNAseq and sequential fluorescence in situ hybridization data. *Nature biotechnology*.  
366 2018;36(12):1183.
- 367 10. Medaglia C, Giladi A, Stoler-Barak L, De Giovanni M, Salame TM, Biram A, et al. Spatial re-  
368 construction of immune niches by combining photoactivatable reporters and scRNA-seq. *Science*.  
369 2017;358(6370):1622–1626.
- 370 11. Muraro MJ, Dharmadhikari G, Grün D, Groen N, Dielen T, Jansen E, et al. A single-cell transcriptome  
371 atlas of the human pancreas. *Cell systems*. 2016;3(4):385–394.

- 372 12. Saunders A, Macosko EZ, Wysoker A, Goldman M, Krienen FM, de Rivera H, et al. Molecular  
373 diversity and specializations among the cells of the adult mouse brain. *Cell*. 2018;174(4):1015–1030.
- 374 13. Regev A, Teichmann SA, Lander ES, Amit I, Benoist C, Birney E, et al. Science forum: the human  
375 cell atlas. *Elife*. 2017;6:e27041.
- 376 14. Rozenblatt-Rosen O, Stubbington MJ, Regev A, Teichmann SA. The Human Cell Atlas: from vision  
377 to reality. *Nature News*. 2017;550(7677):451.
- 378 15. Consortium H, et al. The human body at cellular resolution: the NIH Human Biomolecular Atlas  
379 Program. *Nature*. 2019;574(7777):187.
- 380 16. Haghverdi L, Lun AT, Morgan MD, Marioni JC. Batch effects in single-cell RNA-sequencing data are  
381 corrected by matching mutual nearest neighbors. *Nature biotechnology*. 2018;36(5):421–427.
- 382 17. Stuart T, Butler A, Hoffman P, Hafemeister C, Papalexi E, Mauck III WM, et al. Comprehensive  
383 integration of single-cell data. *Cell*. 2019;177(7):1888–1902.
- 384 18. Lopez R, Regier J, Cole MB, Jordan MI, Yosef N. Deep generative modeling for single-cell transcrip-  
385 tomics. *Nature methods*. 2018;15(12):1053–1058.
- 386 19. Johansen N, Quon G. scAlign: a tool for alignment, integration, and rare cell identification from  
387 scRNA-seq data. *Genome biology*. 2019;20(1):1–21.
- 388 20. Ge S, Wang H, Alavi A, Xing E, Bar-Joseph Z. Supervised Adversarial Alignment of Single-Cell RNA-  
389 seq Data. In: Schwartz R, editor. *Research in Computational Molecular Biology*. Cham: Springer  
390 International Publishing; 2020. p. 72–87.
- 391 21. Wagner F, Yanai I. Moana: A robust and scalable cell type classification framework for single-cell  
392 RNA-Seq data. *BioRxiv*. 2018; p. 456129.
- 393 22. Pomerleau F, Colas F, Siegwart R, et al. A review of point cloud registration algorithms for mobile  
394 robotics. *Foundations and Trends® in Robotics*. 2015;4(1):1–104.
- 395 23. Besl P, McKay ND. A method for registration of 3-D shapes. *IEEE Transactions on Pattern Analysis  
396 and Machine Intelligence*. 1992;14(2):239–256.
- 397 24. Korsunsky I, Millard N, Fan J, Slowikowski K, Zhang F, Wei K, et al. Fast, sensitive and accurate  
398 integration of single-cell data with Harmony. *Nature methods*. 2019; p. 1–8.

- 399 25. Tian L, Su S, Dong X, Amann-Zalcenstein D, Biben C, Seidi A, et al. scPipe: A flexible  
400 R/Bioconductor preprocessing pipeline for single-cell RNA-sequencing data. *PLOS Computational*  
401 *Biology*. 2018;14(8):1–15. doi:10.1371/journal.pcbi.1006361.
- 402 26. Hashimshony T, Senderovich N, Avital G, Klochendler A, de Leeuw Y, Anavy L, et al. CEL-Seq2:  
403 sensitive highly-multiplexed single-cell RNA-Seq. *Genome biology*. 2016;17(1):77.
- 404 27. Baron M, Veres A, Wolock SL, Faust AL, Gaujoux R, Vetere A, et al. A single-cell transcriptomic  
405 map of the human and mouse pancreas reveals inter-and intra-cell population structure. *Cell systems*.  
406 2016;3(4):346–360.
- 407 28. Ding J, Adiconis X, Simmons SK, Kowalczyk MS, Hession CC, Marjanovic ND, et al. Systematic  
408 comparison of single-cell and single-nucleus RNA-sequencing methods. *Nature biotechnology*. 2020; p.  
409 1–10.
- 410 29. Nowotschin S, Setty M, Kuo YY, Liu V, Garg V, Sharma R, et al. The emergent landscape of the  
411 mouse gut endoderm at single-cell resolution. *Nature*. 2019;569(7756):361–367.
- 412 30. Pijuan-Sala B, Griffiths JA, Guibentif C, Hiscock TW, Jawaid W, Calero-Nieto FJ, et al. A single-cell  
413 molecular map of mouse gastrulation and early organogenesis. *Nature*. 2019;566(7745):490–495.
- 414 31. Godin G, Rioux M, Baribeau R. Three-dimensional registration using range and intensity information.  
415 In: *Videometrics III*. vol. 2350. International Society for Optics and Photonics; 1994. p. 279–290.
- 416 32. Ahuja RK, Magnanti TL, Orlin JB. Bipartite Weighted Matching Problem. In: *Network Flows:*  
417 *Theory, Algorithms, and Applications*. Englewood Cliffs, N.J: Prentice Hall; 1993. p. 470–473.
- 418 33. Jungnickel D. The Network Simplex Algorithm. In: *Graphs, Networks and Algorithms*. Berlin,  
419 Heidelberg: Springer Berlin Heidelberg; 2005. p. 321–339. Available from: [https://doi.org/10.](https://doi.org/10.1007/3-540-26908-8_11)  
420 [1007/3-540-26908-8\\_11](https://doi.org/10.1007/3-540-26908-8_11).
- 421 34. Tarjan RE. Dynamic trees as search trees via euler tours, applied to the network simplex algorithm.  
422 *Mathematical Programming*. 1997;78(2):169–177.
- 423 35. Büttner M, Miao Z, Wolf FA, Teichmann SA, Theis FJ. A test metric for assessing single-cell RNA-seq  
424 batch correction. *Nature methods*. 2019;16(1):43.

## 425 Supporting information captions

- 426 • S1 Figure. The distance matrix between cells in batches  $A$  and  $B$ .
- 427 • S1 Algorithm. Greedy pair assignment algorithm.
- 428 • S2 Figure. A comparison of runtimes of a greedy matching algorithm (Algorithm S1) compared to a  
429 network flow-based approach for finding an optimal partial matching (Min Cost Flow).
- 430 • S3 Figure. Comparison of using a rigid transformation versus an affine transformation in the SCIPR  
431 method.
- 432 • S4 Figure. Quantitative scoring of alignment methods on the Pancreas dataset with a cell type held  
433 out from the target set.
- 434 • S5 Figure. Quantitative scoring of alignment methods on the PBMC dataset with a cell type held out  
435 from the target set.
- 436 • S1 Table. Cell type and batch distributions for three scRNA-seq datasets we use for evaluation.
- 437 • S6 Figure. Quantitative scoring of alignment methods on the CellBench dataset with a cell type held  
438 out from the source set.
- 439 • S7 Figure. Quantitative scoring of alignment methods on the Pancreas dataset with a cell type held  
440 out from the source set.
- 441 • S8 Figure. Quantitative scoring of alignment methods on the PBMC dataset with a cell type held out  
442 from the source set.
- 443 • S2 Table. Gene enrichment analysis of Differential Expression results.
- 444 • S3 Table. Gene enrichment analysis of model weights from SCIPR-mnn.
- 445 • S4 Table. Gene enrichment analysis of model weights from SCIPR-gdy.
- 446 • S5 Table. Quantitative alignment scores from all alignment tasks in our work.
- 447 • S1 Appendix. scRNA-seq alignment benchmarking software and data.
- 448 • S2 Appendix. Data preprocessing and filtration.
- 449 • S3 Appendix. Software and settings for related methods.



- 450     • S4 Appendix. Computing the final affine transformation at the end of SCIPR.
- 451     • S5 Appendix. Parameter settings for SCIPR experiments.
- 452     • S6 Appendix. Differential expression analysis.
- 453     • S7 Appendix. Selecting top genes from SCIPR models for enrichment analysis.
- 454     • S8 Appendix. Gene set enrichment analysis.
